# Supplementary material for: Single-cell RNA-sequencing analysis reveals the molecular mechanism of subchondral bone cell heterogeneity in the development of osteoarthritis
Source: HighWire-hosted journal article supplement (doi:10.1136/rmdopen-2022-002314), 2022-09-01
Supplement: rmdopen-2022-002314supp001_data_supplement.pdf [file rmdopen-2022-002314supp001_data_supplement.pdf]

Table S1. Clinical and demographic characteristics of the patients

|                    | Patient 1               | Patient 2                               |
|--------------------|-------------------------|-----------------------------------------|
| Gender             | Female                  | Female                                  |
| Age (years)        | 74                      | 72                                      |
| BMI                | 26.89                   | 29.14                                   |
| TKA                | Right                   | Left                                    |
| KSS score          | 54                      | 58                                      |
| Chronic conditions | Hypertension (grade II) | Type 2 diabetes, hypertension (grade I) |

Table S2. Markers of each cell type

| Cell type  | Markers                        |
|------------|--------------------------------|
| B cell     | CD79A, BANK1, MS4A1            |
| NK cell    | GZMB, NKG7                     |
| NKT cell   | NKG7, CD3D                     |
| T cell     | CD3D, CD3G                     |
| DC         | LILRA4, PTCRA                  |
| Monocyte   | CSTA, FCN1                     |
| Macrophage | CD14, CD68, CSF1R, C1QC, F13A1 |
| EC         | PECAM1, CLDN5                  |
| MSC        | MCAM                           |
| OB         | RUNX2, CDH11                   |

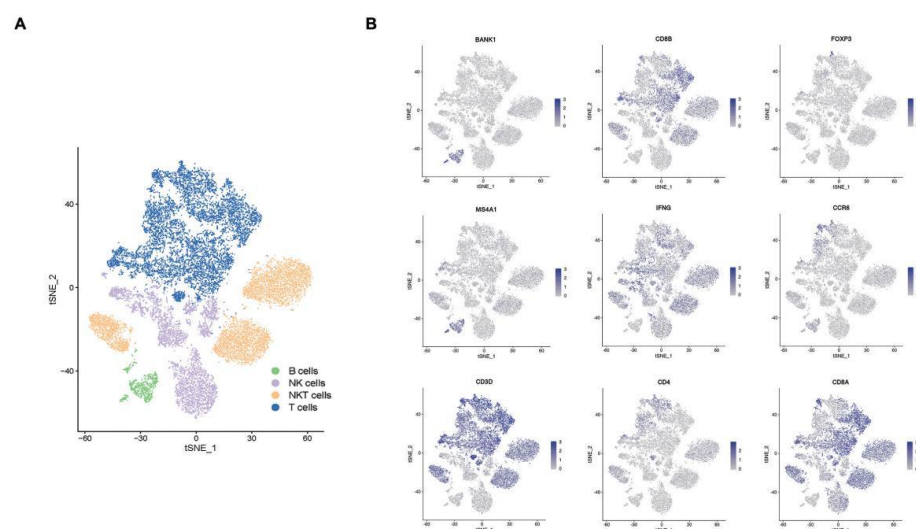**supplementary figure S1****Single-cell profiling of human OA subchondral bone immune cells**

(A)t-SNE plots of Immune cells colored by cluster

(B)Dot plots showing the expression of indicated markers for each cell types on the t-SNE map.

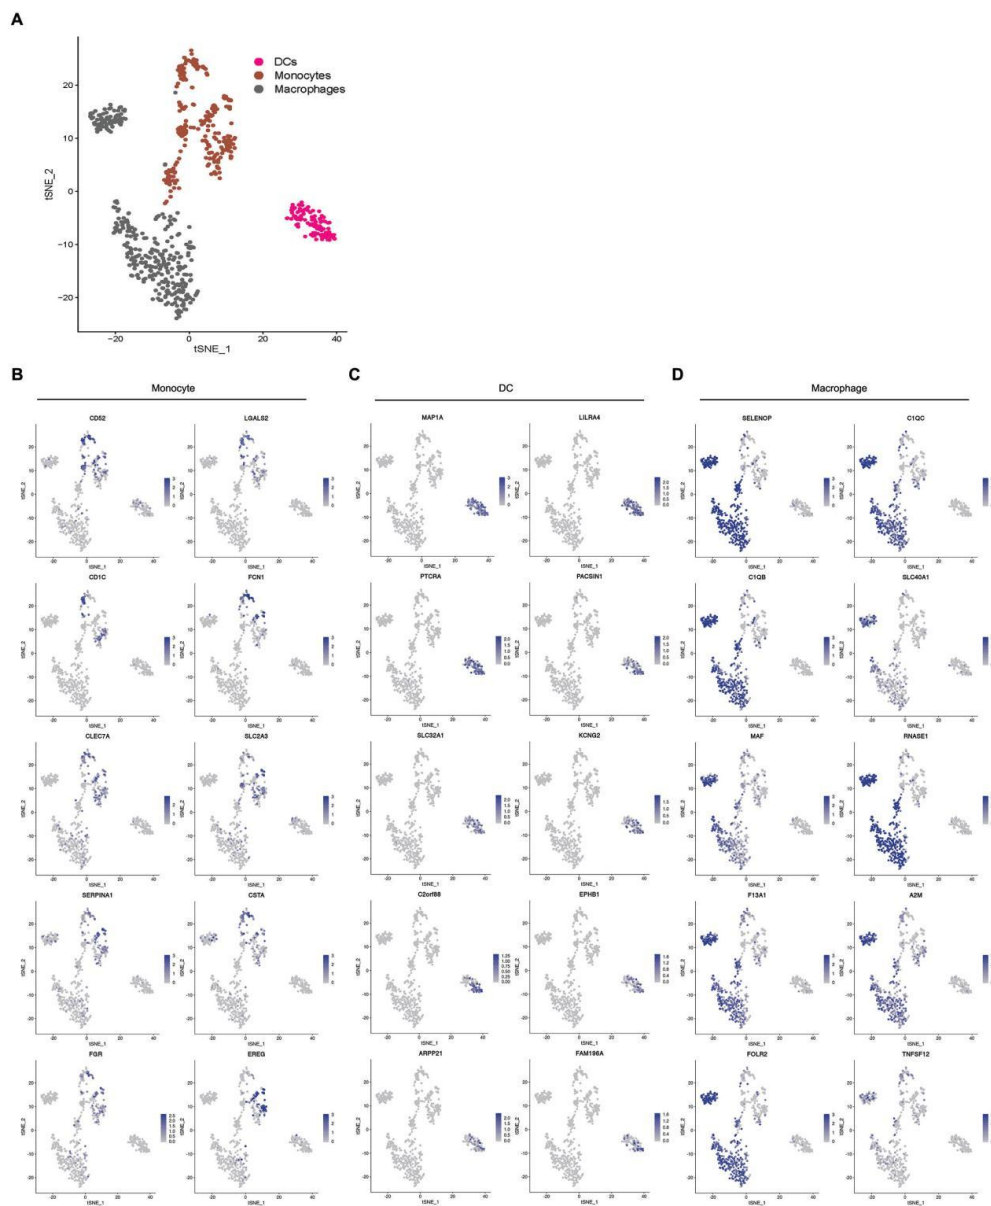

**supplementary figure S2**

**Single-cell profiling of human OA subchondral bone myeloid cells**

(A)t-SNE plots of myeloid cells colored by cluster

(B-D)Dot plots showing the expression of indicated markers for each cell types on the t-SNE map.

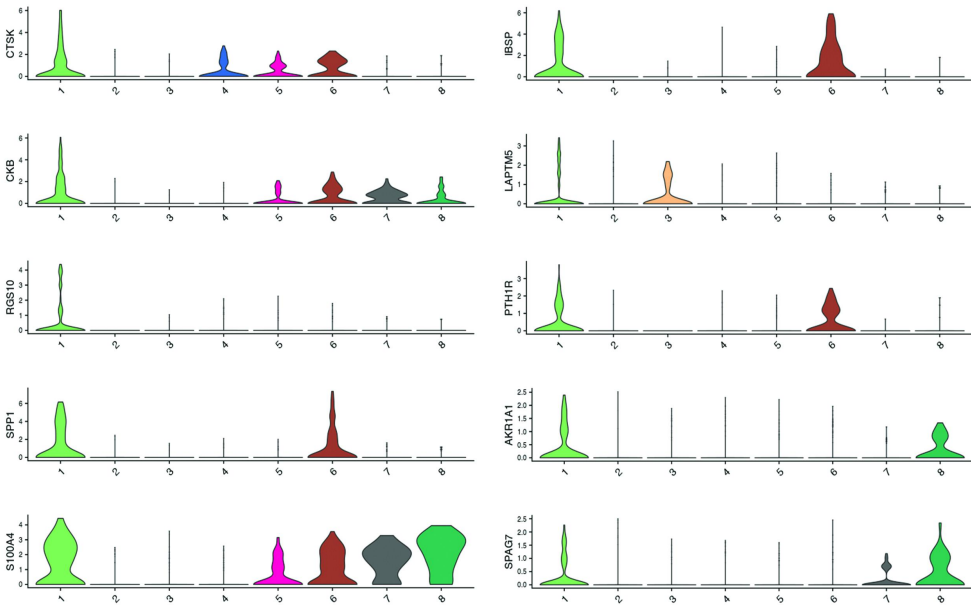

supplementary figure S3

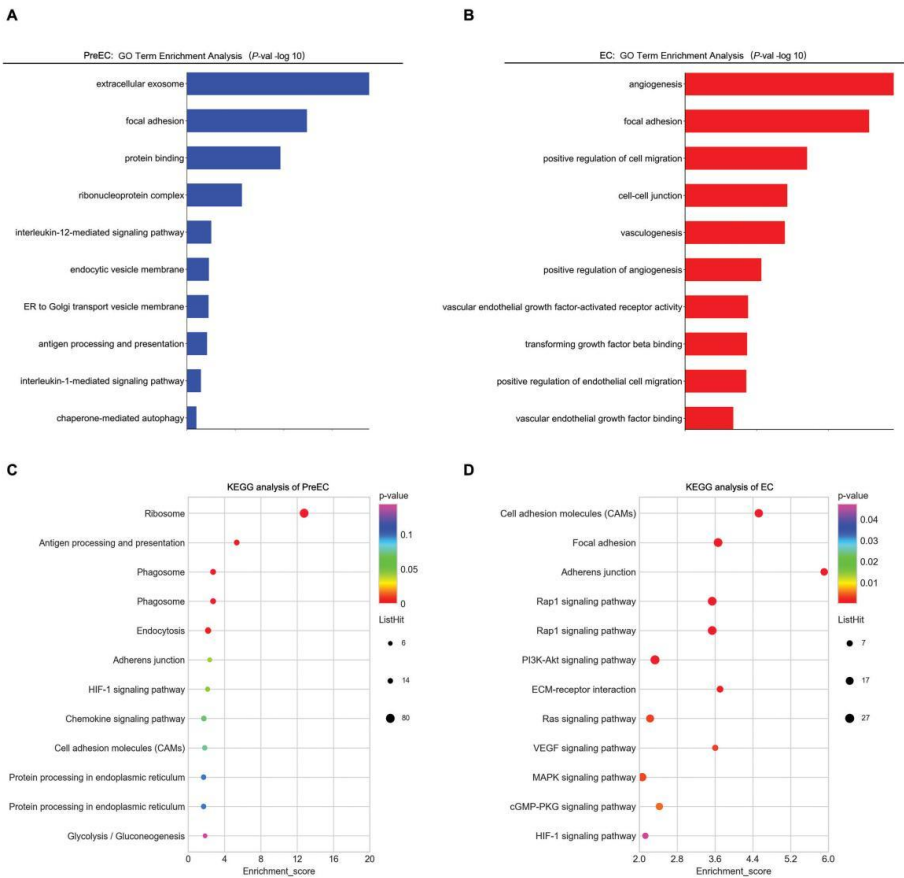

**supplementary figure S4**  
**Identification of Pre-ECs and ECs**

- (A) Enriched GO functions of upregulated genes in Pre-ECs.
- (B) Enriched GO functions of upregulated genes in ECs.
- (C) Enrichment plot from KEGG pathway analysis for Pre-ECs.
- (D) Enrichment plot from KEGG pathway analysis for ECs.

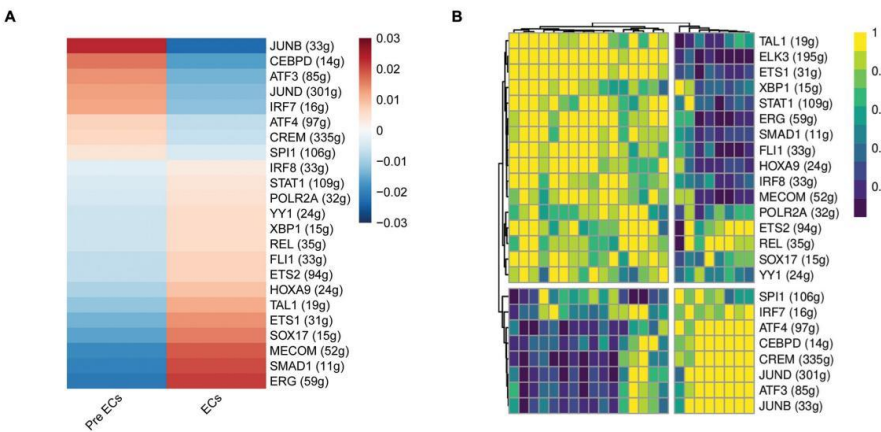

**supplementary figure S5**

**The difference between Pre-ECs and ECs in transcriptional regulation**

Single-cell regulatory network inference and clustering (SCENIC) analysis showing distinct regulons between ECs and Pre-ECs. The heatmap listing only the regulons with significant differences

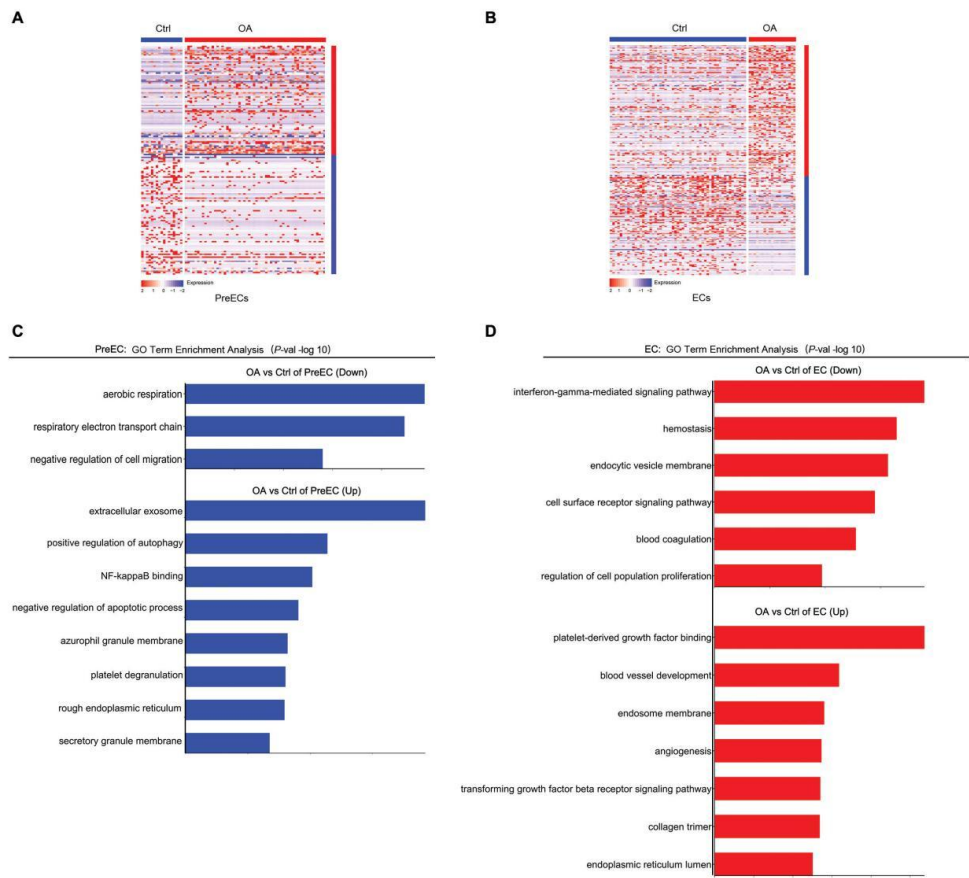

**supplementary figure S6**  
**Identification of OA group and Ctrl group in endothelial cells**  
(A)Heatmap of DEGs between OA group and Ctrl group in Pre-ECs and ECs  
(B)GO functions enrichment analysis of OA versus ctrl upregulated genes in Pre-ECs and ECs

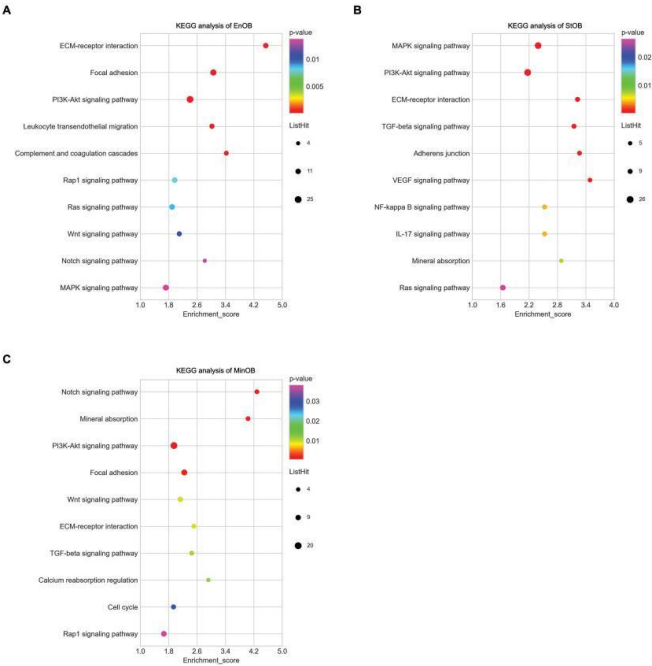

**supplementary figure S7**  
**KEGG showing enrichment of pathways among EnOBs, StOBs and MinOBs**  
(A)Enrichment plot from KEGG pathway analysis for EnOBs  
(B)Enrichment plot from KEGG pathway analysis for StOBs  
(C)Enrichment plot from KEGG pathway analysis for MinOBs



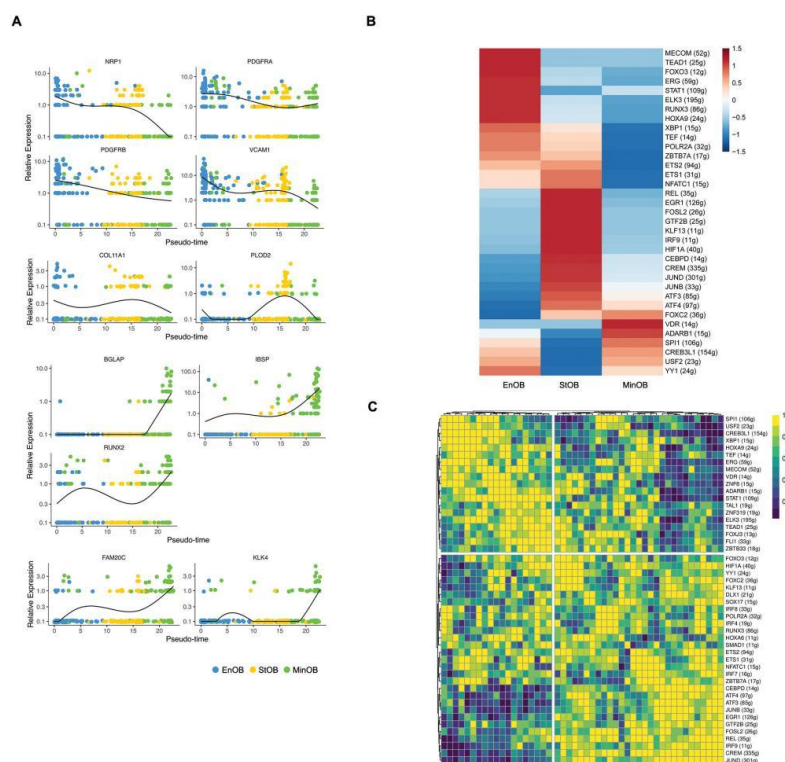

## supplementary figure S8

### Identification of EnOB, StOB and MinOB

(A) Pseudotemporal expression dynamics of marker gene in EnOBs,StOBs and MinOBs. All single cells in the EnOBs,StOBs and MinOBs cell lineage are ordered based on pseudotime.

(B-C) Single-cell regulatory network inference and clustering (SCENIC) analysis showing distinct regulons among EnOBs,StOBs and MinOBs.The heatmap listing only the regulons with significant differences.

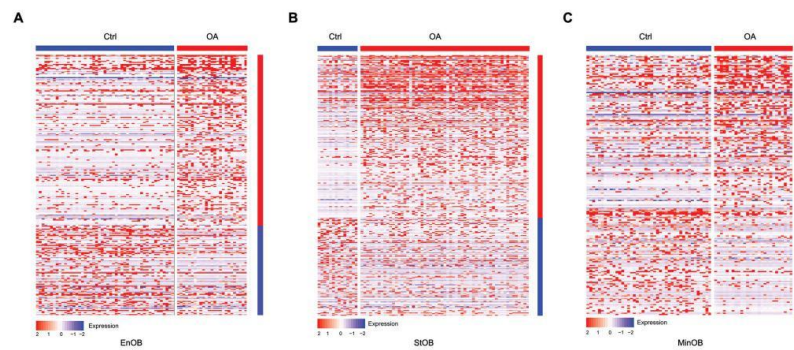**supplementary figure S9****Identification of OA group and Ctrl group in osteoblasts**

- (A) Heatmap of DEGs between OA group and Ctrl group in EnOBs
- (B) Heatmap of DEGs between OA group and Ctrl group in StOBs
- (C) Heatmap of DEGs between OA group and Ctrl group in MinOBs

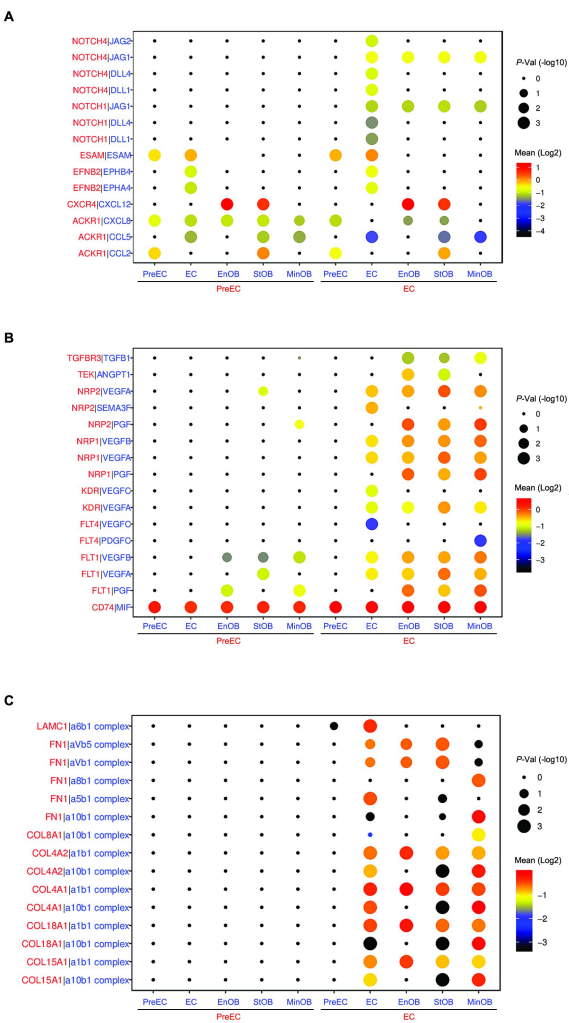

**supplementary figure S10**

**Vascular endothelial cell and osteoblast subtype interaction**

CellPhoneDB analysis showing the number of ligand-receptor interactions between endothelial cell subpopulation and osteoblast subpopulation.

Bubble plots show ligand-receptor pairs of cytokines (A) , growth factors (B) and integrin (C) between endothelial cells subpopulation.
